# Supplementary material for: Expression regulation of MALATE SYNTHASE involved in glyoxylate cycle during protocorm development in Phalaenopsis aphrodite (Orchidaceae)
Source: PubMed Central journal article supplement (PMC7308390; doi:10.1038/s41598-020-66932-8), 2020-06-22
Supplement: 41598_2020_66932_MOESM1_ESM.pdf [file 41598_2020_66932_MOESM1_ESM.pdf]

1 **Supplementary Information**

2

3 **Expression regulation of malate synthase involved in glyoxylate cycle during**  
4 **protocorm development in *Phalaenopsis aphrodite* (Orchidaceae)**

5

6 Wan-Lin Wu<sup>1,2§</sup>, Yu-Yun Hsiao<sup>3§</sup>, Hsiang-Chia Lu<sup>1,2,4</sup>, Chieh-Kai Liang<sup>2</sup>, Chih-Hsiung  
7 Fu<sup>6</sup>, Tian-Hsiang Huang<sup>3</sup>, Ming-Hsiang Chuang<sup>5</sup>, Li-Jun Chen<sup>1</sup>, Zhong-Jian Liu<sup>4\*</sup>, and  
8 Wen-Chieh Tsai<sup>2,3,5,\*</sup>

9

10

11

12

13

14

15

16

17

18

19

20

21

22

23

24

25

26

27

28

29

30

31

32

33

34

35

## Content

36

37

38 Supplementary Figures.....3

39 Figure S1. Expression profiles analysis of *PaICL* and *PaMLS* of different  
40 developmental protocorm stage in *P. aphrodite* by RT-PCR.....3

41 Figure S2. Number of unigenes related to transcription factors in each transcription  
42 factor family.....4

43 Supplementary Tables.....5

44 Table S1 List of primers used in this study.....5

45 Table S2 Prdicted ATHB5 binding sites on 2000 bp upstream sequence of *PaMLS*.....6

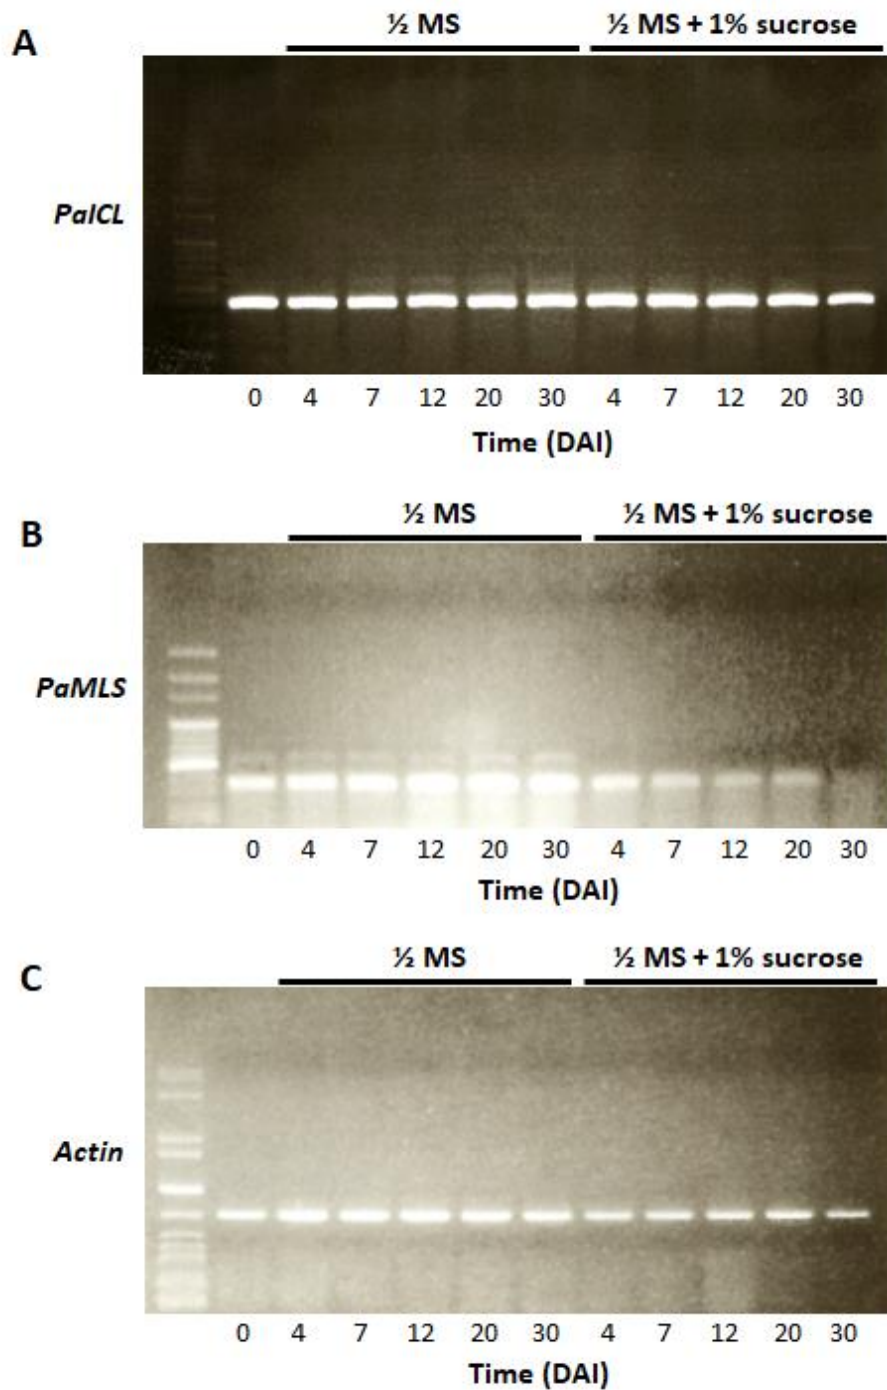

**Figure S1. Expression profiles analysis of *PaICL* and *PaMLS* of different developmental protocorm stage in *P. aphrodite* by RT-PCR.**

*P. aphrodite* seeds after resuspended in  $\frac{1}{2}$  MS liquid medium for 48 hr which were defined as 0 DAI protocorms. 4 to 30 DAI protocorms incubated in the absence of sucrose or in the presence of 1% sucrose of  $\frac{1}{2}$  MS medium. (A) *PaICL* (B) *PaMLS* (C) *Actin*. (DAI, days after incubation).

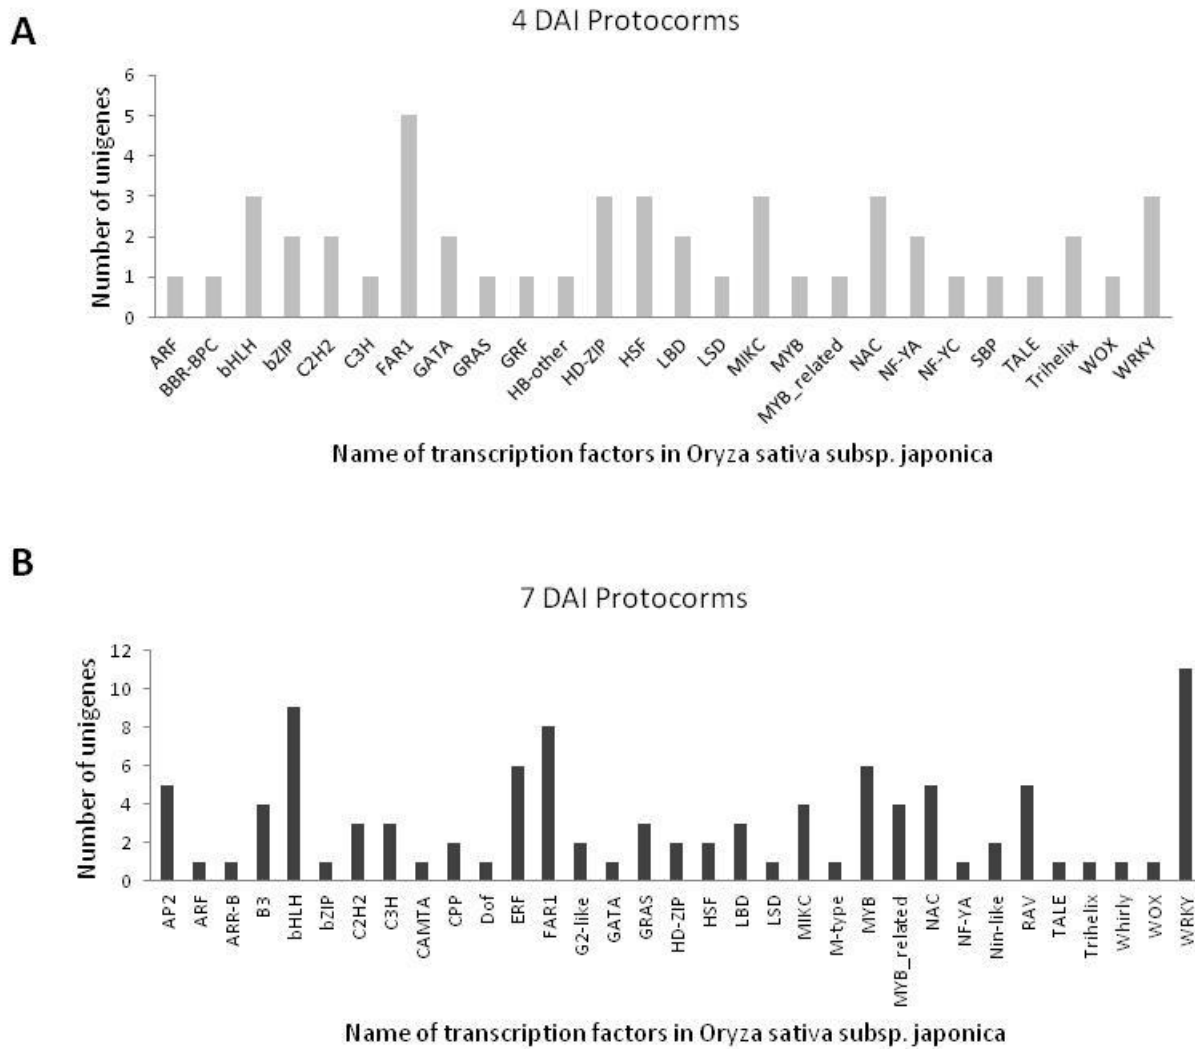

**Figure S2. Number of unigenes related to transcription factors in each transcription factor family**

Number of unigenes related to transcription factors 10-fold up-regulated in (A) 4-DAI protocorms and (B) 7-DAI protocorms.

**Table S1 List of primers used in this study**

| Primer name                                             | Sequence                             |
|---------------------------------------------------------|--------------------------------------|
| <b>For real-time quantitative PCR</b>                   |                                      |
| QPaMals-F                                               | CGTGGAACAAGGTCGAGCTTTAGG             |
| QPaMals-R                                               | TGGGGAACAAGCTCCACAACCTTC             |
| QPaICL-F                                                | GCAAATCAGGTCCGGGACGATG               |
| QPaICL-R                                                | ATCCATCCACTCCTAAACATCGAATCC          |
| QPaANT-F                                                | AGTGGTGGAGTTGGAGGATTTG               |
| QPaANT-R                                                | GCATCGAGACTCCAAGCA                   |
| QPaHB5-F                                                | GATGAGGGGGATGGAATGTATG               |
| QPaHB5-R                                                | CAGCTCCATATTTGTTATCACATTCC           |
| QPaMADS2-F                                              | AGGGAACTTACCGCGCTCTA                 |
| QPaMADS2-R                                              | GAGATGGGGGATCTATTCAGAGAGA            |
| QPaMYB4-F                                               | ATCGAGTGATGATGAGGCTTATTTT            |
| QPaMYB4-R                                               | AACCCAAGTCATCCAAACTCC                |
| QPaPIF3-F                                               | GCGTGTTGTTTGGCGCAAGTGGCAT            |
| QPaPIF3-R                                               | AGGCGCCCAAATATCAGCACCGTTG            |
| QPaRAV1-1-F                                             | CAGTTATGGGGATTCATGATTTTTC            |
| QPaRAV1-1-R                                             | TTCTCCGCATCCAAATCCATC                |
| QPaWRKY18-F                                             | GAAGAACTCCGATAACTTTGAACAGA           |
| QPaWRKY18-R                                             | AATGCAAATGAGTTCAAGGTCTAGT            |
| QPaWRKY71-F_2                                           | TCCCGCTTATCCGAAAACAT                 |
| QPaWRKY71-R                                             | TCGAGCCGCAAGGTTCAA                   |
| <b>For RACE</b>                                         |                                      |
| 3'PaMLS_F1                                              | GTCCCTTCTTTTACCTCCCAA                |
| 3'PaMLS_F2                                              | GCTCCGTTCTCACTCTGCTGG                |
| 5'PaICL_R1                                              | GCCCCGAGAATGAACTGGTGGTC              |
| 5'PaICL_R2                                              | CCTCTTGCTGCTTGCGGTCGTGGTAG           |
| <b>For PaMLS promoter-reporter plasmid construction</b> |                                      |
| PaMLSp_1000_5'_ <i>Bam</i> H I                          | GGATCCTTCAGATAGGTTACAGGTAAATTATATAGA |
| PaMLSp_3'_ <i>Nco</i> I                                 | CCATGGCGTCACCACCGGAG                 |
| <b>For PaHB5 plasmid construction</b>                   |                                      |
| PaHB5_5'_ <i>Xba</i> I                                  | TCTAGAATGGAAGAAGAGAAGTCTCTGATCA      |
| PaHB5_3'_ <i>Bam</i> H I                                | GGATCCTCATCCATCCCAAACCTCCC           |

**Table S2 Predicted ATHB5 binding sites on 2000 bp upstream sequence of *PaMLS***

| Putative binding site | Strand <sup>a</sup> | Putative binding sequence |
|-----------------------|---------------------|---------------------------|
| -1662                 | +                   | ttcTTATTg                 |
| -1328                 | +                   | ggcTTATTa                 |
| -1108                 | +                   | aacTTATTt                 |
| -800                  | +                   | caaTTATTt                 |
| -796                  | +                   | tatTTATTt                 |
| -792                  | +                   | tatTTATTt                 |
| -769                  | -                   | aAATAAaaa                 |
| -756                  | -                   | aAATAAgaa                 |
| -709                  | +                   | tatTTATTa                 |
| -706                  | +                   | ttaTTATTt                 |
| -702                  | +                   | tatTTATTt                 |
| -611                  | +                   | taaTTATTt                 |
| -598                  | +                   | aagTTATTa                 |
| -590                  | -                   | aAATAAtat                 |
| -559                  | +                   | aaaTTATTt                 |
| -499                  | +                   | aatTTATTt                 |
| -487                  | -                   | tAATAAatt                 |
| -334                  | -                   | aAATAAata                 |
| -330                  | -                   | aAATAAtat                 |
| -296                  | -                   | aAATAAtat                 |
| -278                  | -                   | tAATAAaaa                 |
| -241                  | -                   | aAATAAcga                 |

a: Forward or reverse directions of binding sequences
